# Supplementary material
Source: bioRxiv or medRxiv preprint supplement (https://www.biorxiv.org/highwire/filestream/93045/field_highwire_adjunct_files/1/302604-2.pdf)
Supplement: Supplementary file [file 302604-2.pdf]

**Supplemental Table 1.** A description of the published experimental data sets used in each figure, as well as the PRESTO settings used and the number of genes or proteins passing the pre-processing filters.

| name                                       | data type                           | platform                                              | PRESTO settings                                                            | description                                                                                                                                                                                                                                     | source           |
|--------------------------------------------|-------------------------------------|-------------------------------------------------------|----------------------------------------------------------------------------|-------------------------------------------------------------------------------------------------------------------------------------------------------------------------------------------------------------------------------------------------|------------------|
| Human PBMCs after flu vaccination          | Transcriptomics<br>n = 20,898 genes | Affymetrix<br>Human U133 Plus<br>2.0 Array            | CoV $\geq$ 2<br>(=1298 genes; 1,875 for combined)<br>perp = 50             | PBMCs isolate from 33 patients at day 0, 3, and 7 after flu vaccination with the 2011 vaccine.                                                                                                                                                  | GSE74816         |
| Peritoneal macrophages of 75 mouse strains | transcriptomics<br>n = 13,699 genes | Affymetrix HT<br>Mouse Genome<br>430A Array           | CoV $\geq$ 1.5<br>(= 2,423 genes)<br>perp = 50 (100 for combined analysis) | Peritoneal macrophages of 75 commercially available strains of the hybrid mouse diversity panel were elicited using thioglycollate for 4 days, harvested, and activated with 2ng/ml LPS or 50ug/ml oxPAPC in vitro for 4h or before sequencing. | GSE38705         |
| Activated human macrophages                | transcriptome<br>15798 genes        | Illumina<br>HumanHT-12<br>V4.0                        | CoV factor $\geq$ 1.8<br>(= 2083 genes)<br>perp. = 50                      | Human monocyte-derived macrophages from one single donor (ficoll-concentrated PBMCs 10 days in culture) were activated in vitro using 33 different stimuli combinations.                                                                        | GSE68854         |
| Kidney transplant rejection, training set  | transcriptomics<br>n = 20,872 genes | Affymetrix<br>Human Gene 1.0<br>ST Array              | CoV $\geq$ 2.1<br>(= 1549 genes)<br>perp = 30                              | Kidney transplant biopsies of patients with a healthy transplant (n=20) or with antibody-mediated rejection (n=28) as assessed by histology. The latter had a positive titer of donor-specific antibodies.                                      | GSE50084         |
| Kidney transplant rejection, test set      | transcriptomics<br>n = 20,647 genes | Affymetrix<br>Human Genome<br>U133 Plus 2.0<br>Array  |                                                                            | Large dataset of kidney biopsy transcriptomes of patients with antibody-mediated rejection (n=65) or healthy status (n=281) confirmed by histology. Healthy nephrectomy samples (not transplanted) were used as controls (n=8).                 | GSE36059         |
| Acute myeloid leukemia, training set       | transcriptomics<br>n = 18,308 genes | Illumina<br>HumanHT-12<br>V4.0 expression<br>beadchip | CoV $\geq$ 2.25<br>(= 1,474 genes)<br>perp = 50                            | Bone marrow cells from 83 patients were sorted based on CD34/CD38 expression in fractions (n=227) and tested for leukemia stem cell (LSC) activity.                                                                                             | GSE76008         |
| Acute myeloid leukemia, test set           | transcriptomics<br>n = 13,480 genes | Affymetrix<br>Human Genome<br>U133A Array             |                                                                            | Peripheral blood mononuclear cells of untreated patients with cytogenetically normal acute myeloid leukemia were sequenced (n=163).                                                                                                             | GSE12417         |
| Clear cell renal carcinoma                 | proteomics<br>n = 783 proteins      | LTQ Orbitrap XL                                       | CoV $\geq$ 1.03<br>(= 209 proteins)<br>perp = 20                           | Tumor biopsies and adjacent normal tissue were taken from patients undergoing nephrectomy. Each sample was classified by histology. Stage 1 (n=17), stage 2 (n=20), stage 3 (n=21), stage 4 (n=26)                                              | PMID<br>27128972 |
